# Supplementary material for: DSCR9/miR-21-5p axis inhibits pancreatic cancer proliferation and resistance to gemcitabine via BTG2 signaling: DSCR9/miR-21-5p/BTG2 regulates pancreatic cancer
Source: PubMed Central journal article supplement (PMC10157615; doi:10.3724/abbs.2022194), 2022-12-26
Supplement: 083Table1.pdf [file 083Table1.pdf]

**Table 1 Antibody dilutions for western blot analysis**

| <b>Antibody name</b>                                                                                                     | <b>Dilution</b> |
|--------------------------------------------------------------------------------------------------------------------------|-----------------|
| TRAF6                                                                                                                    | 1/ 5000         |
| MEK1/2                                                                                                                   | 1/ 3000         |
| p-p65, p-I $\kappa$ B $\alpha$ , I $\kappa$ B $\alpha$ , p-MEK1/2                                                        | 1/ 2500         |
| $\beta$ -actin, MKK7, p-ASK1, p-ERK1, Bad, Bax                                                                           | 1/ 2000         |
| p-MKK7, JNK1, IKK $\beta$ , IL-10                                                                                        | 1/ 1500         |
| DUSP9, p65, p-IKK $\beta$ , IKK, p-IKK, IL-1 $\beta$ , p-TAK1, TAK1, ASK1, p-p38, ERK1, Bcl2, TNF- $\alpha$ , c-Caspase3 | 1/ 1000         |
| p-JNK1, p38                                                                                                              | 1/ 500          |

TRAF6, p-MKK7, p-JNK1, p-MEK1/2, IL-10, IL-1 $\beta$ , c-Caspase-7 were from Abcam, Cambridge, UK;  $\beta$ -actin, p-IKK, IKK, IKK $\beta$ , p-I $\kappa$ B $\alpha$ , I $\kappa$ B $\alpha$ , p-p65, Bad, p65, MKK7, TAK1, Bcl2, p-TAK1, TNF- $\alpha$ , MEK1/2, c-Caspase-3 were from Beyotime, Shanghai, China; DUSP9, p-IKK $\beta$  (Invitrogen, Carlsbad, USA), p-ERK1 were from Merck, Shanghai, China; and JNK1, p-p38, p38, ERK1, ASK1, p-ASK1, p-MKK4, and MKK4 were from Zenbio, Chengdu, China.
