# Supplementary material for: DSCR9/miR-21-5p axis inhibits pancreatic cancer proliferation and resistance to gemcitabine via BTG2 signaling: DSCR9/miR-21-5p/BTG2 regulates pancreatic cancer
Source: PubMed Central journal article supplement (PMC10157615; doi:10.3724/abbs.2022194), 2022-12-26
Supplement: 083Table2.pdf [file 083Table2.pdf]

**Table 2. Sequences of primers used in this study**

| <b>Gene</b>                     | <b>Primer sequence (5'→3')</b> |                           |
|---------------------------------|--------------------------------|---------------------------|
| <i>IL-10</i>                    | Forward                        | AACCCAGGCACATCCGAAAAGC    |
|                                 | Reverse                        | AGAGACTACGCAGAGACCACAGAC  |
| <i>IL-1<math>\beta</math></i>   | Forward                        | CCGTGGACCTTCCAGGATGA      |
|                                 | Reverse                        | GGGAACGTACACACCAGCA       |
| <i>Arg-1</i>                    | Forward                        | CTGCCTGCTTTCTGAGTGCTGAG   |
|                                 | Reverse                        | CCTGTGGTTCCGATAAGTGCTTCC  |
| <i>CXCL-2</i>                   | Forward                        | ATGCCTGAAGACCCTGCCAAG     |
|                                 | Reverse                        | GGTCAGTTAGCCTTGCCTTTG     |
| <i>MCP-1</i>                    | Forward                        | TTTTTGTACCAAGCTCAAGAG     |
|                                 | Reverse                        | TTCTGATCTCATTTGGTTCCGA    |
| <i>CXCL-10</i>                  | Forward                        | CAACTGCATCCATATCGATGAC    |
|                                 | Reverse                        | GATTCCGGATTCAGACATCTCT    |
| <i>HRPT</i>                     | Forward                        | TCAACGGGGGACATAAAAAGT     |
|                                 | Reverse                        | TGCATTGTTTTACCAGTGTCAA    |
| <i>TNF-<math>\alpha</math></i>  | Forward                        | GTCACCAGTTCCTCAGTTGTG     |
|                                 | Reverse                        | CACCTCCATTGTCCCTGTTTTAT   |
| <i>Sam68</i>                    | Forward                        | GCCTACGGACAAGATGACTGGAATG |
|                                 | Reverse                        | GATGCTCTCTGTATGCTCCCTTCAC |
| <i><math>\beta</math>-Actin</i> | Forward                        | GGCTGTATTCCCCTCCATCG      |
|                                 | Reverse                        | CCAGTTGGTAACAATGCCATGT    |
