# Supplementary material for: DSCR9/miR-21-5p axis inhibits pancreatic cancer proliferation and resistance to gemcitabine via BTG2 signaling: DSCR9/miR-21-5p/BTG2 regulates pancreatic cancer
Source: PubMed Central journal article supplement (PMC10157615; doi:10.3724/abbs.2022194), 2022-12-26
Supplement: 243FigS1-S2_TableS.pdf [file 243FigS1-S2_TableS.pdf]

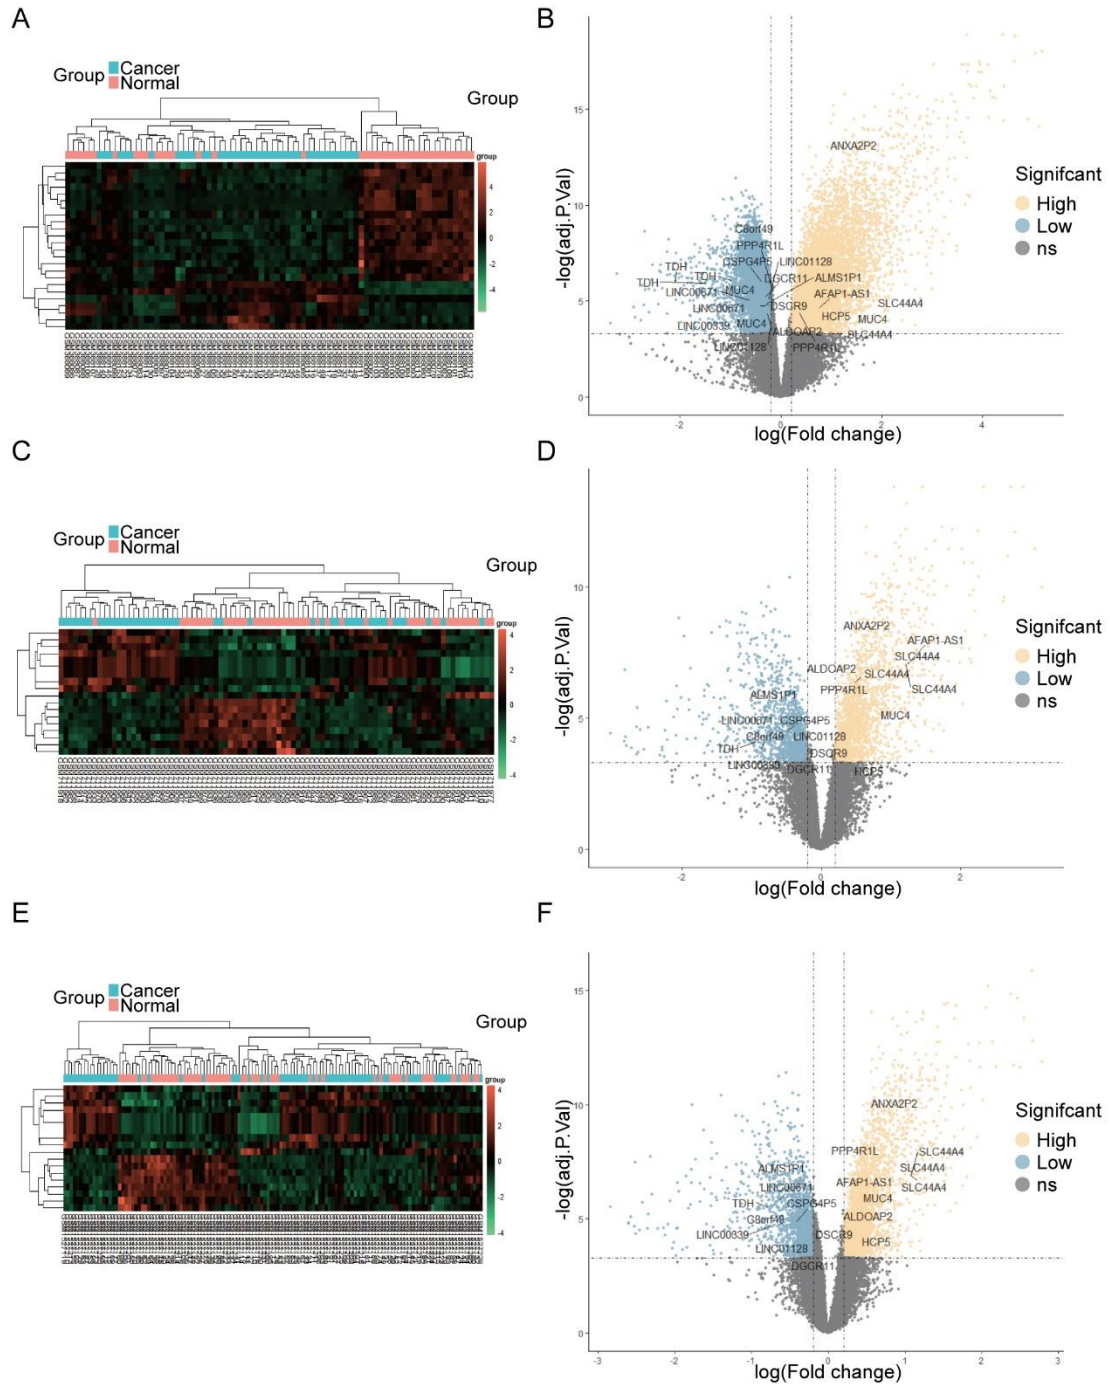

**Supplementary Figure S1. Bioinformatics analysis of pancreatic cancer chips from the Gene Expression Omnibus (GEO) (A,B) GSE15471. (C,D) GSE62452. (E,F) GSE28735.**

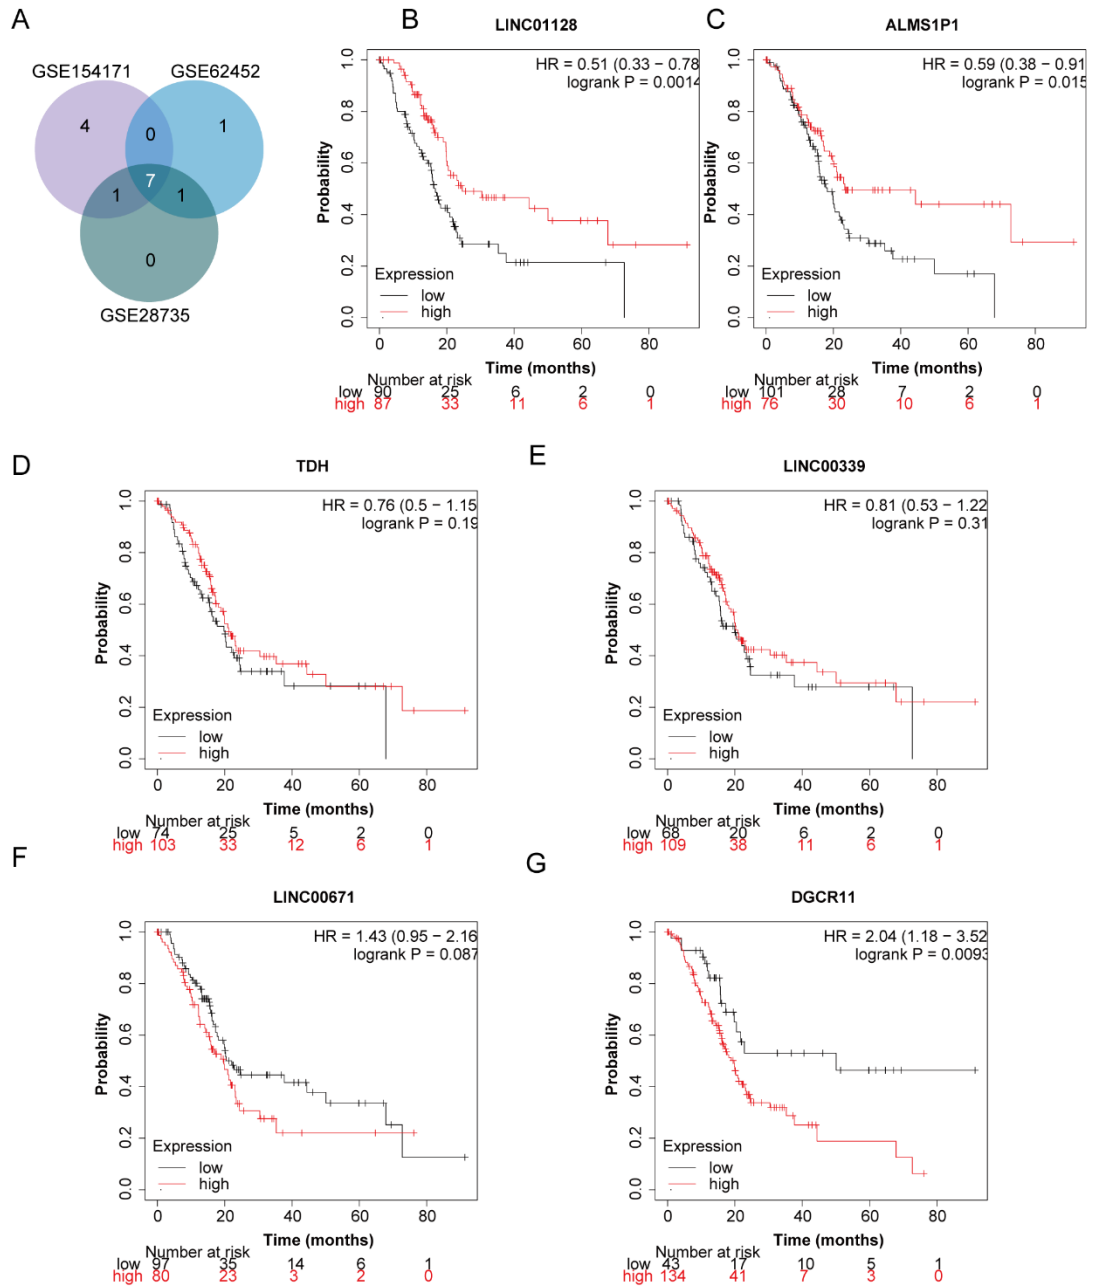

**Supplementary Figure S2. The association between the expression of lncRNA and pancreatic carcinoma patients' survival rate in KmploT**

**Supplementary Table S1. The clinical character of patients**

| No. | Age | Gender | Tumor location | TNM    | Stage |
|-----|-----|--------|----------------|--------|-------|
| 1   | 54  | F      | Head           | T2N0M0 | IB    |
| 2   | 68  | F      | Head           | T1N0M0 | IA    |
| 3   | 70  | F      | Head           | T3N0M0 | IIA   |
| 4   | 53  | M      | Head           | T1N0M0 | IA    |
| 5   | 64  | M      | Head           | T2N1M0 | IIB   |
| 6   | 50  | M      | Head           | T1N1M0 | IIB   |
| 7   | 66  | F      | Head           | T1N0M0 | IA    |
| 8   | 57  | F      | Head           | T1N1M0 | IIB   |
| 9   | 38  | F      | Head           | T1N0M0 | IA    |
| 10  | 67  | M      | Head           | T2N0M0 | IB    |
| 11  | 70  | F      | Head           | T2N0M0 | IB    |
| 12  | 65  | M      | Head           | T1N1M0 | IIB   |
| 13  | 75  | F      | Head           | T1N0M0 | IA    |
| 14  | 56  | M      | Head           | T1N0M0 | IA    |
| 15  | 53  | M      | Head           | T2N0M0 | IB    |
